# Supplementary material for: Perilesional edema in brain metastases as predictive factor of response to systemic therapy in non-small cell lung cancer patients: a preliminary study
Source: PubMed Central journal article supplement — Ann Transl Med. 2021 Apr;9(8):648. doi: 10.21037/atm-20-6497 (PMC8106019; doi:10.21037/atm-20-6497), 2021-04
Supplement: atm-09-08-648-dss.pdf [file atm-09-08-648-dss.pdf]

| Data Sharing Statement |                                                                                                                                                     |                                                                                                               |
|------------------------|-----------------------------------------------------------------------------------------------------------------------------------------------------|---------------------------------------------------------------------------------------------------------------|
| Article Info           | <a href="http://dx.doi.org/10.21037/atm-20-6497">http://dx.doi.org/10.21037/atm-20-6497</a>                                                         |                                                                                                               |
| Item                   | Question                                                                                                                                            | Authors' Response<br>(place "-" if not applicable)                                                            |
| 1                      | Would you like to share data collected for your study to others?                                                                                    | Yes                                                                                                           |
| 2                      | If not, would you like to share the reason for your decision?                                                                                       | -                                                                                                             |
| 3                      | What data in particular will be shared?                                                                                                             | The anonymized database and figures                                                                           |
| 4                      | Any other documents will be shared? Such as study protocol, statistical analysis plan, informed consent form, clinical study report, analytic code. | Statistical analysis plan, informed consent form, and clinical study report will also be shared if requested. |
| 5                      | When will data availability begin?                                                                                                                  | Data is already available                                                                                     |
| 6                      | When will data availability end?                                                                                                                    | Permanently                                                                                                   |
| 7                      | To whom will you share the data?                                                                                                                    | Interested researchers                                                                                        |
| 8                      | For what type of analysis or purpose?                                                                                                               | For researchers working on this subject and being interested on the details                                   |
| 9                      | How or where can the data/documents be obtained?                                                                                                    | Emails could be sent to the corresponding author                                                              |
| 10                     | Any other restrictions?                                                                                                                             | N/A                                                                                                           |
